# Supplementary material for: A novel tetraphenylsilane–phenanthroimidazole hybrid host material for highly efficient blue fluorescent, green and red phosphorescent OLEDs
Source: Royal Society of Chemistry journal article supplement (doi:10.1039/c5tc00333d), 2015-01-01
Supplement: c5tc00333d1.pdf [file c5tc00333d1.pdf]

## Supporting Information

### **A Novel Tetraphenylsilane-Phenanthroimidazole Hybrid Host Material for Highly Efficient Blue Fluorescent, Green and Red Phosphorescent OLEDs**

By Dong Liu, Mingxu Du, Dong Chen, Kaiqi Ye, Zuolun Zhang,\* Yu Liu\* and Yue Wang

[\*]Prof. Y. Liu, Y. Wang, Dr. D. Liu, D. Chen, K. Ye, Z. Zhang  
State Key Laboratory of Supramolecular Structure and Materials  
Jilin University, Changchun 130012 (P. R. China)  
E-mail: [yuliu@jlu.edu.cn](mailto:yuliu@jlu.edu.cn), [zuolun\\_zhang@yahoo.com.cn](mailto:zuolun_zhang@yahoo.com.cn)

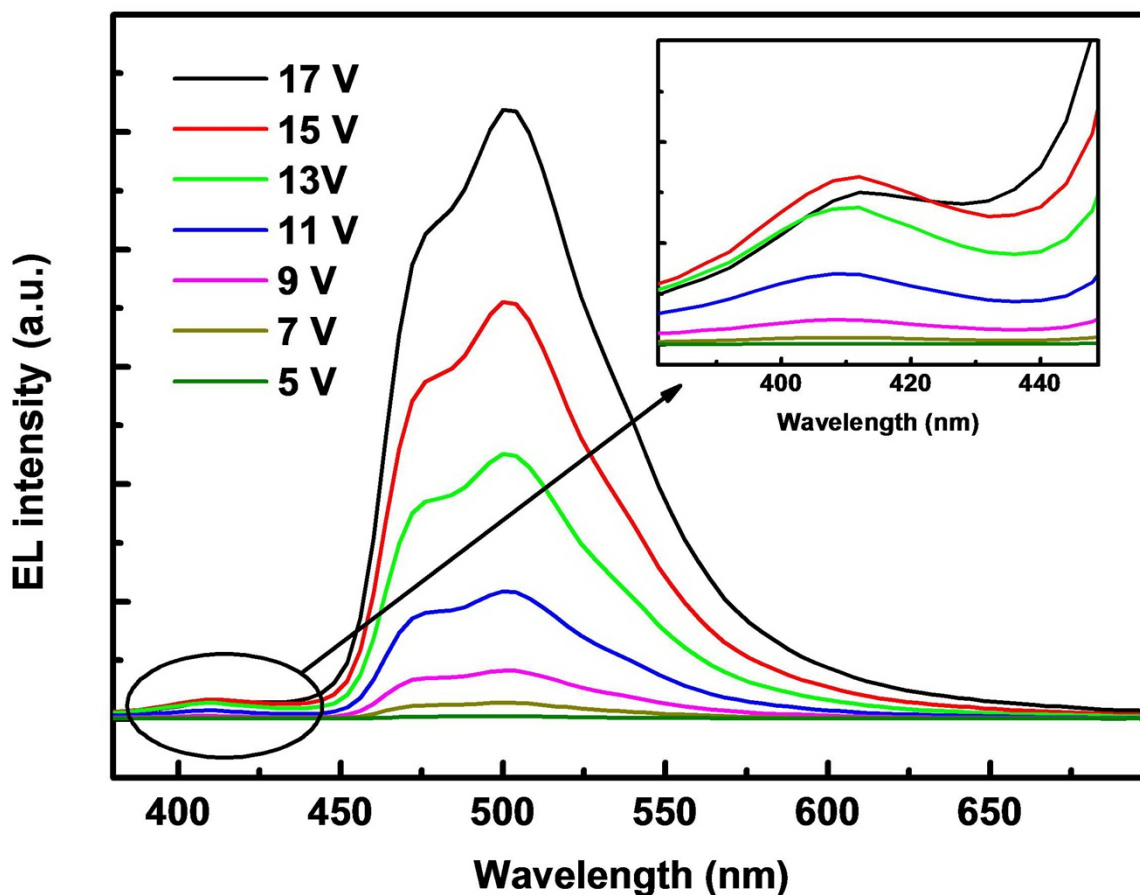

**S-Fig. 1.** EL spectra of sky-blue device based on the EML of doped Si(PPI)<sub>2</sub>:Flrpic detected at different operating voltages. The inset is an enlarged image of the EL curves at the wavelengths from 380 to 450 nm.

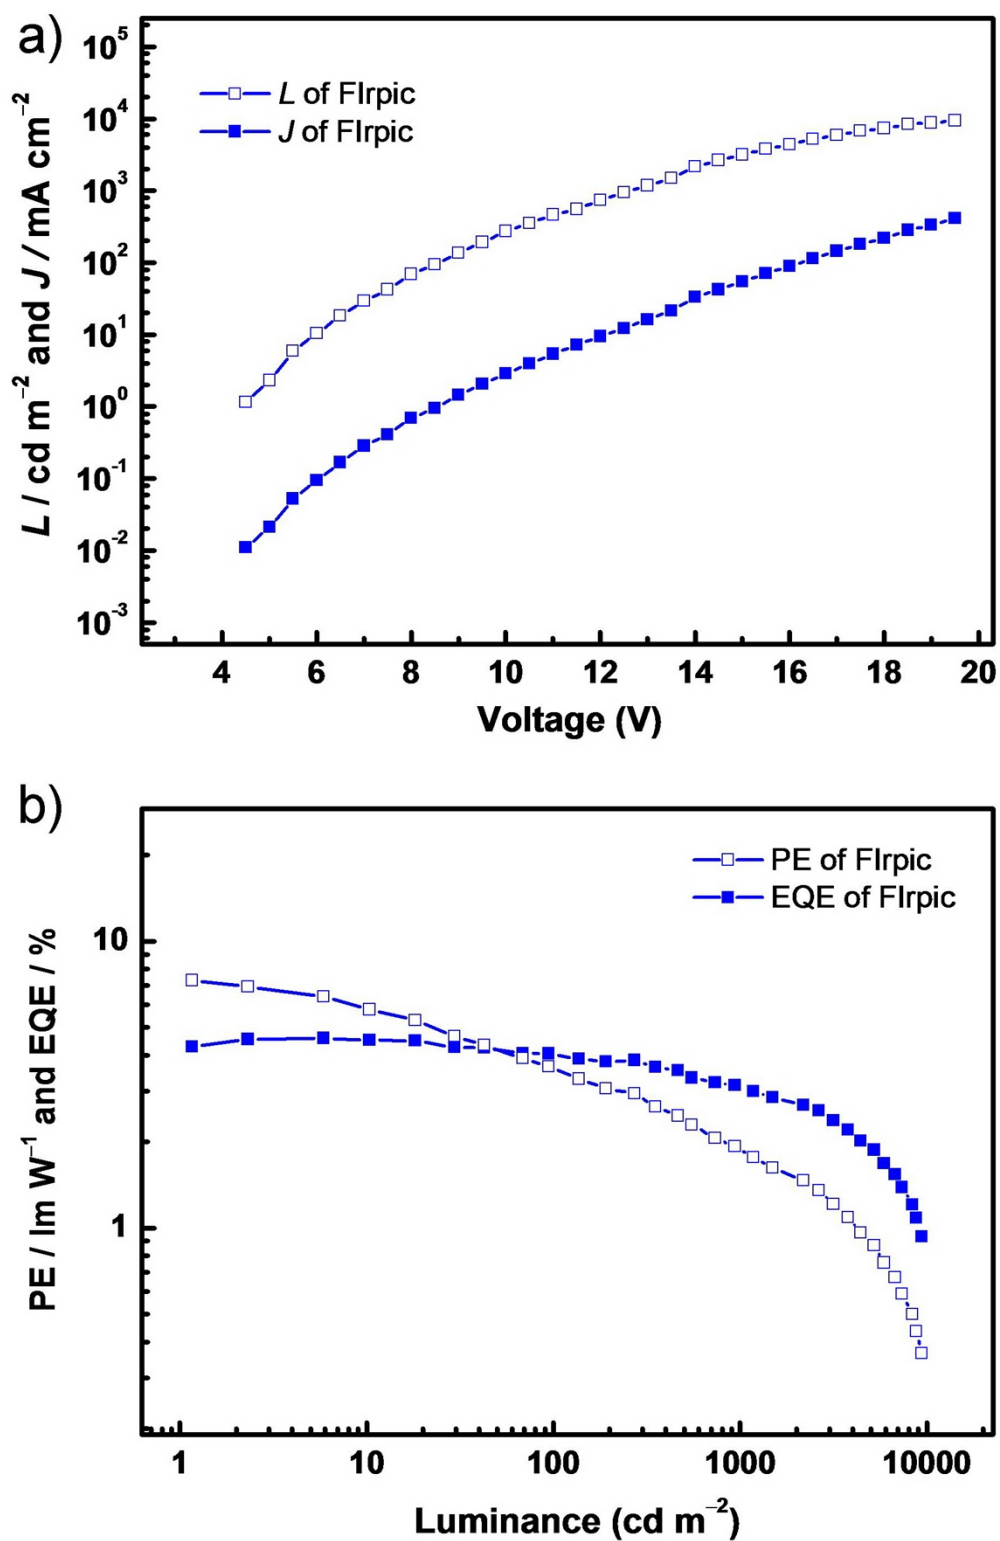

**SI-Fig. 2.** Current density-voltage-luminance ( $J$ - $V$ - $L$ ) curves (a) and power efficiency (PE)-luminance-external quantum efficiency (EQE) curves (b) of sky-blue device based on the EML of doped Si(PPI)<sub>2</sub>:Flrpic.

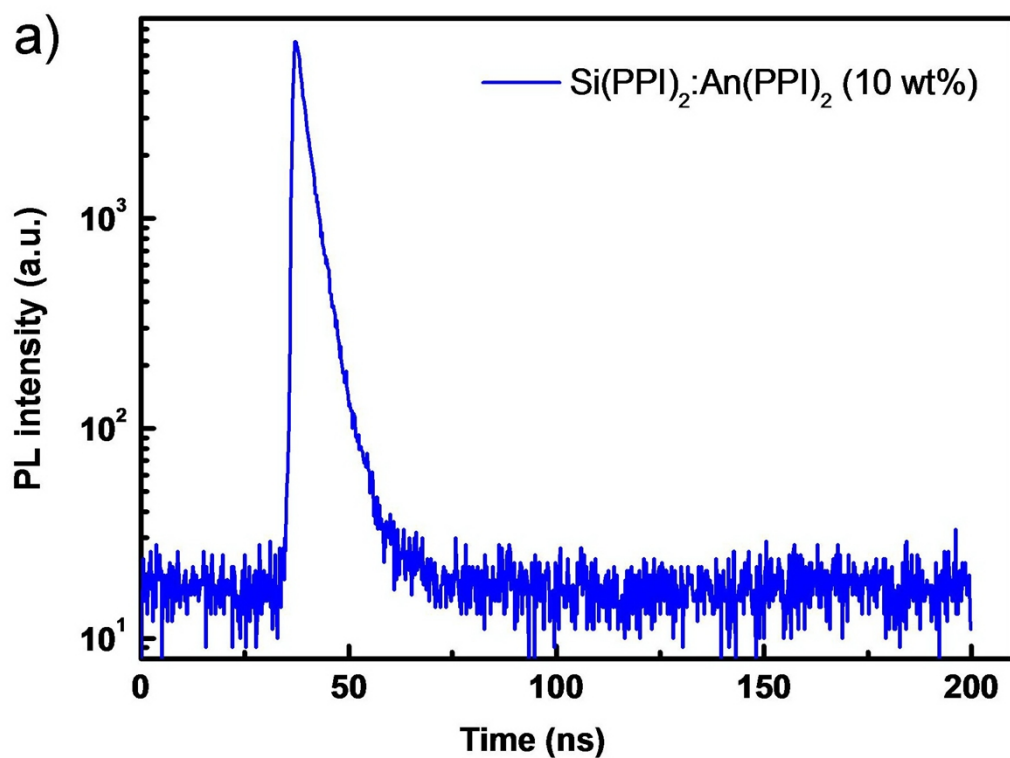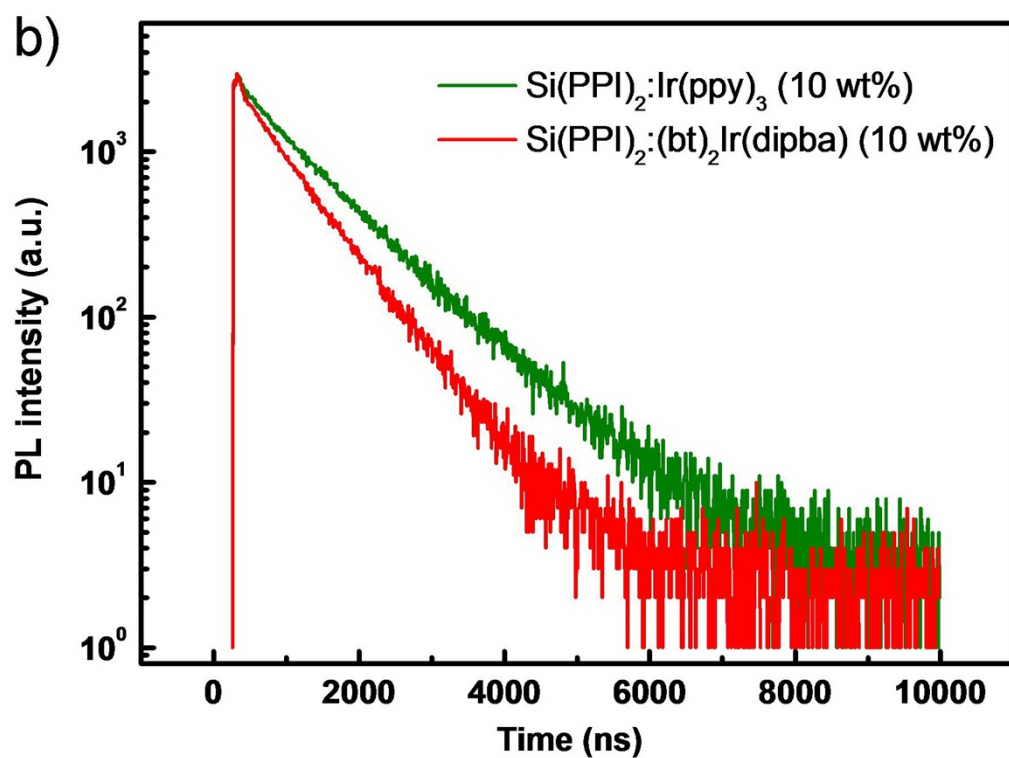

**S-Fig. 3.** Transient PL spectra of  $\text{Si(PPI)}_2$  films doped with 10 wt%  $\text{An(PPI)}_2$  (a),  $\text{Ir(ppy)}_3$  and  $(\text{bt})_2\text{Ir(dipba)}$  (b).

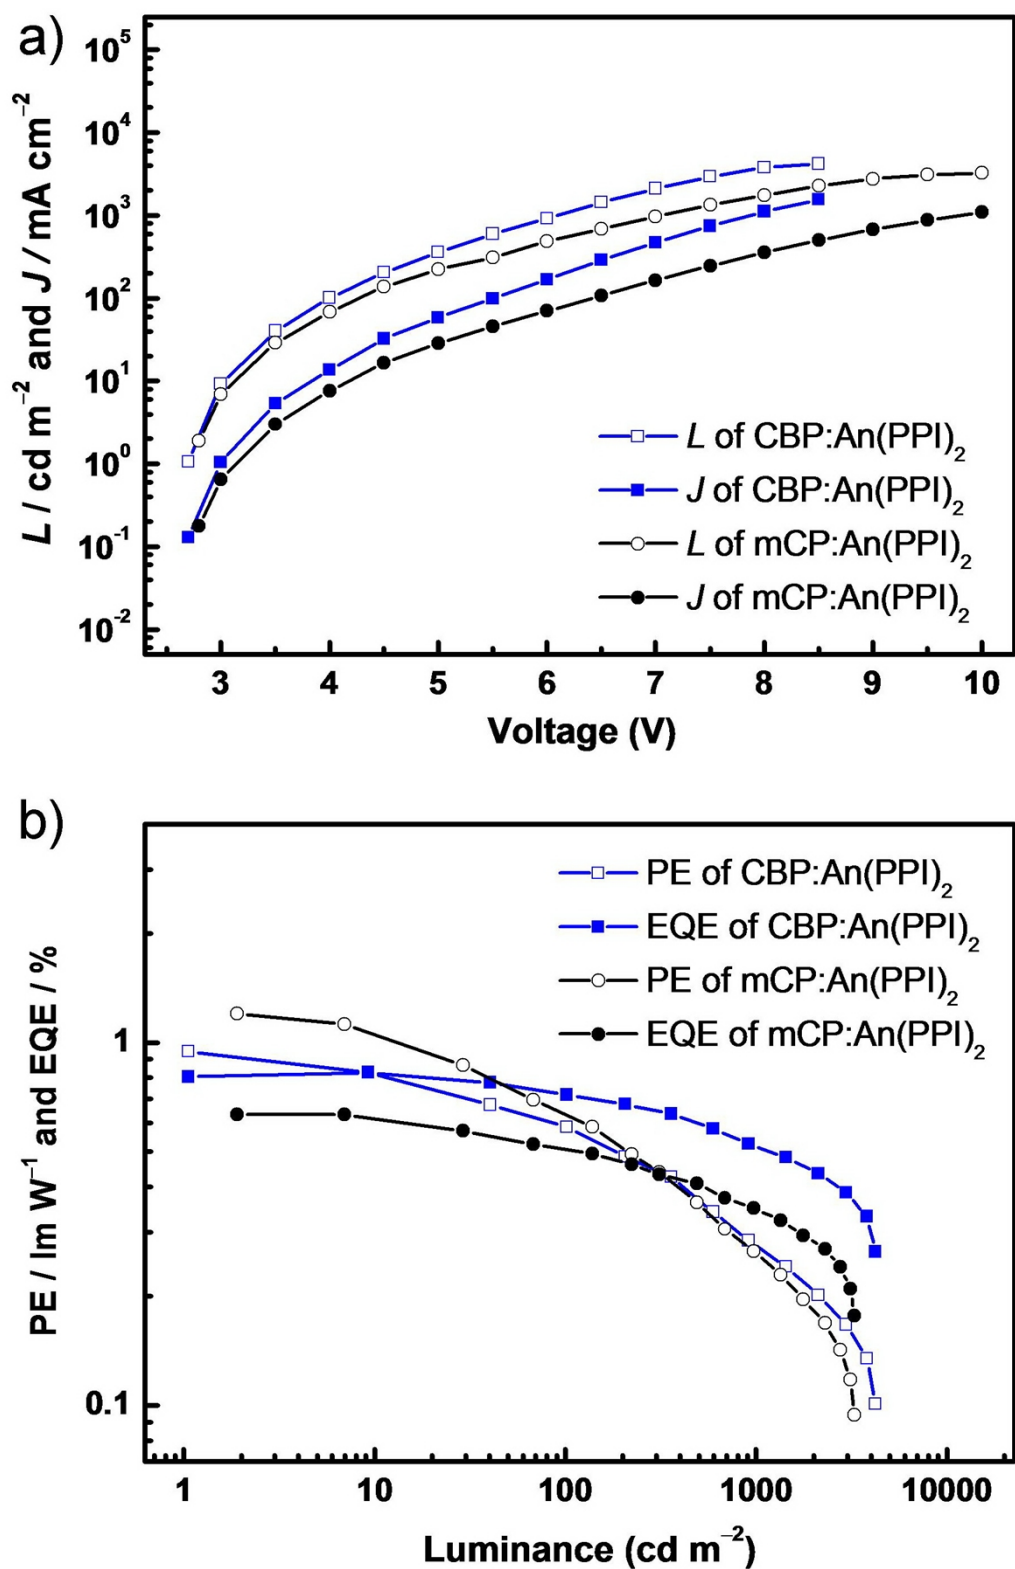

S-Fig. 4. Current density-voltage-luminance ( $J$ - $V$ - $L$ ) curves (a) and power efficiency (PE)-luminance-external quantum efficiency (EQE) curves (b) of the reference blue devices based on the EMLs of doped CBP:An(PPI)<sub>2</sub> and mCP:An(PPI)<sub>2</sub>.
